# Supplementary material
Source: publisher figshare collection journal article supplement (https://aacr.figshare.com/articles/dataset/_/23627633)

# Supplementary Figure 1. Representative tandem MS spectrum of the LPENYTDETWQK peptide from CUL4B as determined by IP-Mass Spec

MEN1.27211.27211.2 File:"MEN1.raw", NativeID:"controllerType=0 controllerNumber=1 scan=27211" Seq: LPENYTDETWQK

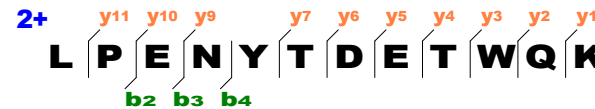

1.6e+05

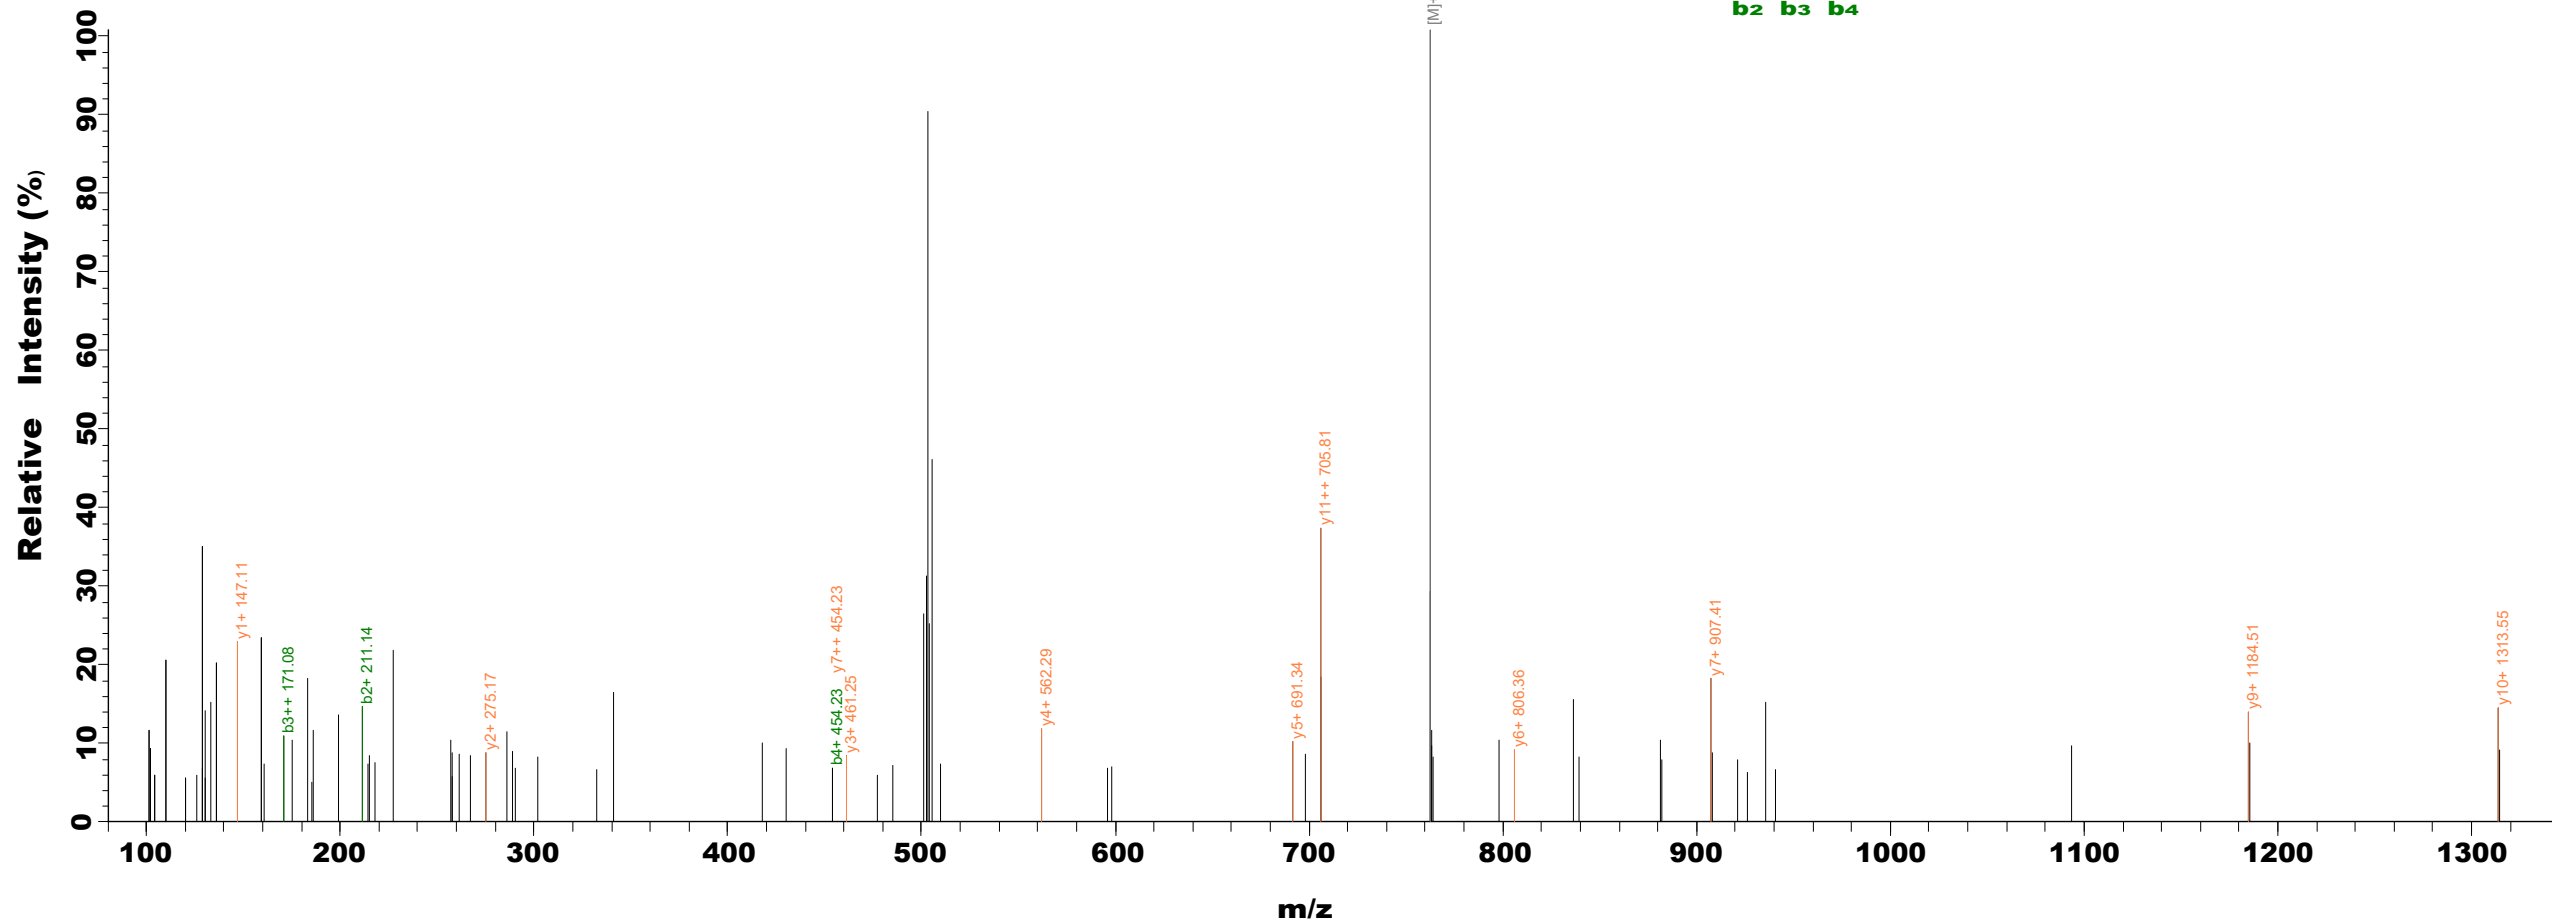

Supplement: Supplementary file 1 [file 41458454]
